# Supplementary material for: A geometry- and muscle-based control architecture for synthesising biological movement
Source: PubMed Central journal article supplement (PMC7925510; doi:10.1007/s00422-020-00856-4), 2021-02-15
Supplement: 422_2020_856_MOESM1_ESM.pdf [file 422_2020_856_MOESM1_ESM.pdf]

# Supplementary material describing the all-body model *allmin*

Johannes Walter, Marc Jacob, Katrin Stollenmaier, Patrick Lerge, and Syn Schmitt

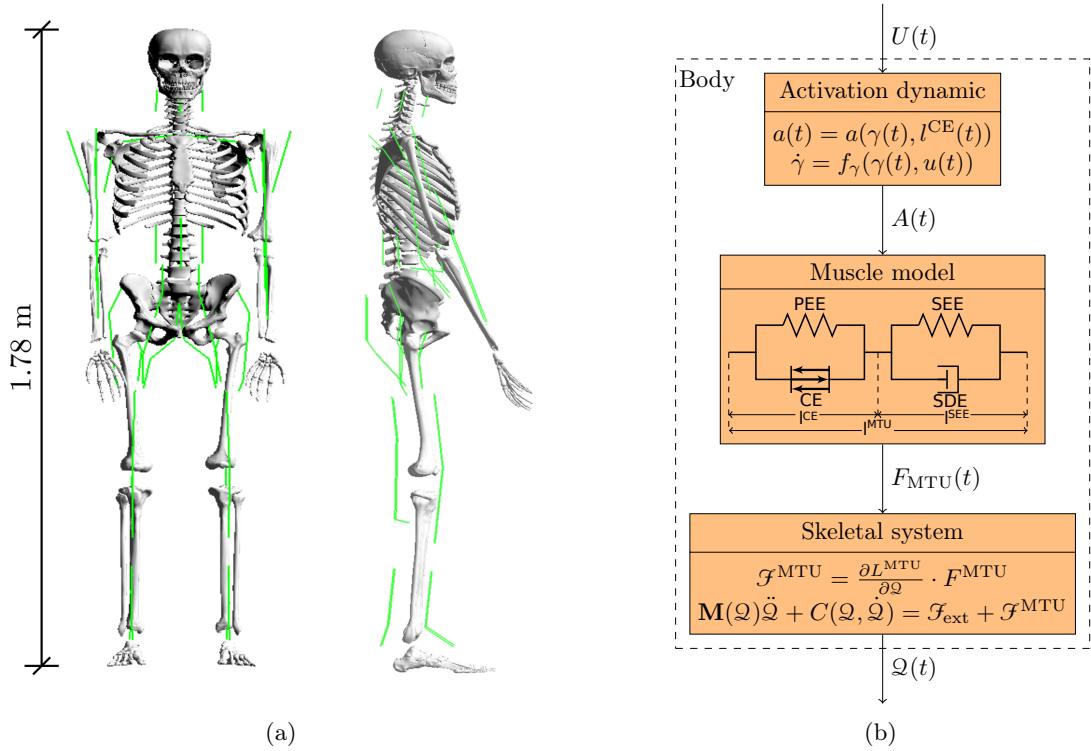

Figure 1: (a) Frontal and side view of the visualization of the musculoskeletal model of the human body. The green lines show the muscle geometry. (c) Structure of the model: the motor command  $U(t) \in \mathbb{R}^{n_{MTU}}$  is fed into the model of activation dynamics (Hatze, 1977; Rockenfelder and Günther, 2018) of muscles which relates the neuronal stimulation to muscular activity  $A(t) \in \mathbb{R}^{n_{MTU}}$  that drives the muscle model (Haeufle et al., 2014). The muscles produce forces  $F^{MTU}(t) \in \mathbb{R}^{n_{MTU}}$  that act on the rigid bodies of the skeletal system. The resultant joint torques  $\mathcal{F}^{MTU}$  depend on the respective moment arms  $\frac{\partial L^{MTU}}{\partial \mathcal{Q}}$ . In combination with external forces, this results in a movement of the DoFs  $\mathcal{Q}(t) \in \mathbb{R}^{n_{DoF}}$  of the body.

The musculoskeletal model *allmin* consists of  $n_{RGB} = 15$  rigid bodies (see Table 1). The rigid bodies are connected via 14 joints (see Table 2) including  $n_{DoF} = 20$  degrees of freedom. Each Degree of Freedom (DoF) (except for the wrist) is controlled by an Agonistic-Antagonistic Setup (AAS) being congruent with the Elementary Biological Drive (EBD) as described by Schmitt et al. (2019). The musculoskeletal model is actuated by  $n_{MTU} = 36$  Muscle Tendon Units (MTU) (see Table 4 and Figure 1a for first impression).

The model is implemented in C/C++ code within our in-house multi-body simulation code *demoa*.

# 1 The Multibody System

The skeletal system is modeled as a chain of rigid bodies, connected by rotational joints and described by differential equations. The resulting DoFs  $\mathcal{Q}(t) = [q_1(t), \dots, q_{n_{\text{DoF}}}(t)]^T \in \mathbb{R}^{n_{\text{DoF}}}$  of these rotational joints describe the movement of the rigid bodies over time and are referred to as generalized coordinates. For the equations of motion, a Lagrangian formulation with the generalized coordinates  $\mathcal{Q}(t)$  as state variables is realized, which can be set up algorithmically, e.g. as described by [Legnani et al. \(1996\)](#). The evaluation of this algorithm leads to the differential equation of motion of the rigid body system in the form

$$\mathbf{M}(\mathcal{Q})\ddot{\mathcal{Q}} + C(\mathcal{Q}, \dot{\mathcal{Q}}) = \mathcal{F}, \quad (1)$$

where  $\mathbf{M} \in \mathbb{R}^{n_{\text{DoF}} \times n_{\text{DoF}}}$  is the mass matrix,  $C \in \mathbb{R}^{n_{\text{DoF}}}$  is a vector of gravitational, centrifugal and Coriolis forces and  $\mathcal{F} \in \mathbb{R}^{n_{\text{DoF}}}$  is a vector of forces (internal and external) acting on the mechanical part of the system. Hereby  $\mathcal{F}$  includes forces, e.g. due to contact of the body to the environment (external), as well as forces of the biological structures, such as muscles, joint limitations (internal).

## 2 Joint limitations

The joint limitations are modeled as linear one-sided spring-damper elements, acting directly on the respective DoF:

$$f_i^{\text{lim}} = \begin{cases} k_l(q_i - q_{l,i}) + d_l\dot{q}_i, & q_i < q_{l,i} \\ 0, & q_{l,i} \leq q_i \leq q_{u,i} \\ k_u(q_i - q_{u,i}) + d_u\dot{q}_i, & q_i > q_{u,i} \end{cases} \quad (2)$$

with the lower and upper threshold angles  $q_{l/u}$ , corresponding to the respective Range of Motion (RoM) ([Table 2](#)), and linear spring and damping parameters  $k_{l/u} = 100 \frac{\text{Nm}}{\text{rad}}$  and  $d_{l/u} = 0.001 \frac{\text{Nm}\cdot\text{s}}{\text{rad}}$ . For the joints of the lumbar and cervical spine, as well as the wrist, the same force law is used to model passive properties with different parameters. The upper and lower threshold angles are set to  $q_{l/u} = 0$  and the spring and damping parameters are set to  $k_{cs} = 10 \frac{\text{Nm}}{\text{rad}}$ ,  $d_{cs} = 0.2 \frac{\text{Nm}\cdot\text{s}}{\text{rad}}$ ,  $k_{ls} = 20 \frac{\text{Nm}}{\text{rad}}$ ,  $d_{ls} = 0.2 \frac{\text{Nm}\cdot\text{s}}{\text{rad}}$ ,  $k_{wr} = 15 \frac{\text{Nm}}{\text{rad}}$ ,  $d_{wr} = 1 \frac{\text{Nm}\cdot\text{s}}{\text{rad}}$ .

## 3 Muscles

The muscles are modeled as lumped muscles, i.e. they represent a multitude of anatomical muscles and motor units. A list of all included muscle elements can be found in [Table 4](#).

The MTU structure is modeled using an extended Hill-type muscle model as described in [Haeufle et al. \(2014\)](#) with muscle activation dynamics as introduced by [Hatze \(1977\)](#) and simplified by [Rockenfeller and Günther \(2018\)](#). Herein, the muscles are activated using a 1<sup>st</sup> order differential equation of normalized calcium ion concentration ([Rockenfeller et al., 2014](#))

$$\dot{\gamma}(t) = M_{\text{H}}(u(t) - \gamma(t)) \quad (3)$$

and a nonlinear mapping onto the muscles activation

$$a(t) = \frac{a_0 + \varpi}{1 + \varpi}, \quad (4)$$

with  $\varpi(\gamma(t), l^{\text{CE}}(t)) = (\gamma(t) \cdot \rho(l^{\text{CE}}))^{\nu}$  and  $\rho(l^{\text{CE}}) = \varpi_{\text{opt}} \cdot \frac{l^{\text{CE}}}{l_{\text{opt}}} = \gamma_c \cdot \rho_0 \cdot \frac{l^{\text{CE}}}{l_{\text{opt}}}$ . The parameter values are chosen muscle non specifically and are given in [Table 5](#).

The muscle model is a macroscopic model consisting of four elements: the Contractile Element (CE), the Parallel Elastic Element (PEE), the Serial Elastic Element (SEE) and Serial Damping Element (SDE), as illustrated in [Figure 1b](#). Herein, the muscle fibers and their contraction dynamics are described by a contractile element (CE) representing the cross-bridge-cycle of the myosin heads and a parallel elastic element (PEE) representing the passive connective tissue in the muscle belly. The viscoelastic properties of tendons are approximated using a series elastic element (SEE) and a serial damping element (SDE).

The inputs to the muscle model are the length of the MTU  $l^{\text{MTU}}$ , the contraction velocity of the MTU  $\dot{l}^{\text{MTU}}$  and the muscular activity  $a$ . The output of the muscle model is a one-dimensional muscle force  $f^{\text{MTU}}$ . This force drives the movement of the skeletal system.

For the routing of the muscle path around the joints, deflection ellipses are implemented as described by [Hammer et al. \(2019\)](#). The muscle path can move within these ellipses and is deflected as soon as it touches the boundary. For the investigations presented here, we set the length of both half-axes of all ellipses to zero, resulting in fixed via points. The position of these points can be found in [Table 3](#). The resulting moment arms translate the muscle force  $F^{\text{MTU}}$  to generalized forces  $\mathcal{F}^{\text{MTU}}$  acting on the DoFs of the system

$$\mathcal{F}^{\text{MTU}} = \frac{\partial L^{\text{MTU}}}{\partial \mathcal{Q}} \cdot F^{\text{MTU}}. \quad (5)$$

All in all, the governing model dependencies for all muscles  $i = 1, \dots, n$  are:

$$\dot{l}_i^{\text{CE}} = f^{\text{CE}}(l_i^{\text{CE}}, l_i^{\text{MTU}}, \dot{l}_i^{\text{MTU}}, a_i) \quad (6)$$

$$\dot{a}_i = f^a(a_i, u_i, l_i^{\text{CE}}) \quad (7)$$

$$f_i^{\text{MTU}} = f_i^{\text{MTU}}(l_i^{\text{MTU}}, \dot{l}_i^{\text{MTU}}, l_i^{\text{CE}}, a_i) \quad (8)$$

$$\ddot{\mathcal{Q}} = f^{\mathcal{Q}}(\dot{\mathcal{Q}}, \mathcal{Q}, F^{\text{MTU}}, \mathcal{F}^{\text{lmt}}, \mathcal{F}^{\text{ext}}), \quad (9)$$

where  $\mathcal{Q} = \{q_i\}_{i=1}^{n_{\text{DoF}}}$  denotes a generalized state vector that contains all joint angles and  $F^{\text{MTU}} = \{f_i^{\text{MTU}}\}_{i=1}^n$ ,  $\mathcal{F}^{\text{lmt}, i} = \{f_i^{\text{lmt}}\}_{i=1}^n$  and  $\mathcal{F}^{\text{ext}} = \{f_i^{\text{ext}}\}_{i=1}^n$  contain the muscle forces, the joint limitation forces and the external forces, respectively.

## 4 Model parameters

| Body Name      | $m$ [kg] | $r_x$ [m] | $r_y$ [m] | $h_z$ [m] | $\mathbf{d}_1$ [m]             | Child         | $\mathbf{d}_2$ [m]                     |
|----------------|----------|-----------|-----------|-----------|--------------------------------|---------------|----------------------------------------|
| Pelvis (world) | 10.2516  | 0.1224    | 0.1643    | 0.18783   | [0,0,0]                        | Spine         | [0.000557293, 0.0000, 0.12213]         |
| Spine          | 33.2397  | 0.1224    | 0.1643    | 0.4166    | [-0.00055, 0.0000, -0.2083]    | Thigh (l/r)   | [0.0147, $\pm$ 0.0796, -0.0657]        |
|                |          |           |           |           |                                | Head          | [0.00055, 0.0000, 0.2083]              |
| Head           | 4.8869   | 0.0993    | 0.0778    | 0.278194  | [-0.0092, 0.0000, -0.11]       | Uparm (l/r)   | [0.00677703, $\pm$ 0.1816, 0.10507988] |
|                |          |           |           |           |                                | -             | -                                      |
| Uparm (l/r)    | 2.1631   | 0.0495    | -         | 0.3065    | [0.0000, 0.0000, 0.1456]       | Forearm (l/r) | [0.0000, 0.0000, -0.1609]              |
| Forearm (l/r)  | 1.3389   | 0.0477    | -         | 0.2725    | [0.0000, 0.0000, 0.1117]       | Hand (l/r)    | [0.0000, 0.0000, -0.1608]              |
| Hand (l/r)     | 0.5252   | 0.028     | 0.089     | 0.192     | [0.0000, 0.0000, 0.0574]       | -             | -                                      |
| Thigh (l/r)    | 8.1719   | 0.0947    | -         | 0.4347    | [0.0000, $\mp$ 0.0188, 0.1782] | Shank (l/r)   | [0.0000, 0.0000, -0.2565]              |
| Shank (l/r)    | 3.3541   | 0.0597    | -         | 0.4239    | [0.0000, $\mp$ 0.0059, 0.1865] | Foot (l/r)    | [0.0000, 0.0000, -0.2374]              |
| Foot (l/r) *   | 1.0172   | 0.0398    | -         | 0.272     | [-0.0656, 0.0000, 0.0402]      | -             | -                                      |

Table 1: List of all bodies included in the model with their mechanical properties with  $m$ : mass,  $r_x, r_y$ : radius in x and y direction,  $h_z$ : height in z direction,  $\mathbf{d}_1$ : distance proximal joint to the body's center of mass and  $\mathbf{d}_2$ : distance center of mass to distal joint. The spine body has an underlying curvature based on [Kitazaki and Griffin \(1997\)](#). The allover body dimensons are based on data describing a 50th percentile male from [NASA \(1978\)](#).

| Name             | Type      | Movement            | RoM [°]           |
|------------------|-----------|---------------------|-------------------|
| Lumbar spine     | Universal | left/right          | [−30 . . . 30]    |
| Lumbar spine     | Universal | flexion/extension   | [0 . . . 30]      |
| Cervical spine   | Universal | left/right          | [−30 . . . 30]    |
| Cervical spine   | Universal | flexion/extension   | [−30 . . . 30]    |
| Shoulder (Right) | Universal | abduction/adduction | [−10 . . . 60]    |
| Shoulder (Right) | Universal | flexion/extension   | [−100 . . . 10]   |
| Elbow (Right)    | Revolute  | flexion/extension   | [−120 . . . 10]   |
| Wrist (Right)    | Revolute  | flexion/extension   | [0 . . . 0]       |
| Shoulder (Left)  | Universal | abduction/adduction | [−10 . . . 60]    |
| Shoulder (Left)  | Universal | flexion/extension   | [−100 . . . 10]   |
| Elbow (Left)     | Revolute  | flexion/extension   | [−120 . . . 10]   |
| Wrist (Left)     | Revolute  | flexion/extension   | [0 . . . 0]       |
| Hip (Right)      | Universal | flexion/extension   | [−120 . . . − 10] |
| Hip (Right)      | Universal | abduction/adduction | [−10 . . . 70]    |
| Knee (Right)     | Revolute  | flexion/extension   | [−1 . . . 120]    |
| Ankle (Right)    | Revolute  | flexion/extension   | [−20 . . . 40]    |
| Hip (Left)       | Universal | flexion/extension   | [−120 . . . 10]   |
| Hip (Left)       | Universal | abduction/adduction | [−10 . . . 70]    |
| Knee (Left)      | Revolute  | flexion/extension   | [−1 . . . 120]    |
| Ankle (Left)     | Revolute  | flexion/extension   | [−20 . . . 40]    |

Table 2: List of all joints included in the model.

| Name       | $R_O$ [m]            |         |         |        | Parent | $R_{DF1}$ [m]        |         |         |        | Parent   | $R_{DF2}$ [m] |              |         |         | Parent    | $R_I$ [m]    |         |         |         | Parent  |
|------------|----------------------|---------|---------|--------|--------|----------------------|---------|---------|--------|----------|---------------|--------------|---------|---------|-----------|--------------|---------|---------|---------|---------|
| LSE        | -0.0283              | 0.0000  | 0.1082  | Pelvis | Pelvis | -0.0399              | 0.0000  | 0.1101  | Pelvis | Pelvis   | -0.0416       | 0.0000       | -0.1310 | Spine   | Spine     | -0.0315      | 0.0000  | -0.1288 | Spine   | Spine   |
| LSF        | 0.0181               | 0.0000  | 0.1006  | Pelvis | Pelvis | 0.0878               | 0.0000  | 0.0891  | Pelvis | Pelvis   | 0.0693        | 0.0000       | -0.1059 | Spine   | Spine     | 0.0089       | 0.0000  | -0.1196 | Spine   | Spine   |
| LSSBL      | -0.0051              | 0.0500  | 0.1044  | Pelvis | Pelvis | -0.0051              | 0.0500  | 0.1044  | Pelvis | Pelvis   | -0.0113       | 0.0500       | -0.1242 | Spine   | Spine     | -0.0113      | 0.0500  | -0.1242 | Spine   | Spine   |
| LSSBR      | -0.0051              | -0.0500 | 0.1044  | Pelvis | Pelvis | -0.0051              | -0.0500 | 0.1044  | Pelvis | Pelvis   | -0.0113       | -0.0500      | -0.1242 | Spine   | Spine     | -0.0113      | -0.0500 | -0.1242 | Spine   | Spine   |
| CSE        | -0.0544              | 0.0000  | 0.1990  | Spine  | Spine  | -0.0544              | 0.0000  | 0.1990  | Spine  | Spine    | -0.0560       | 0.0000       | -0.0701 | Head    | Head      | -0.0560      | 0.0000  | -0.0701 | Head    | Head    |
| CSF        | 0.0427               | 0.0000  | 0.1752  | Spine  | Spine  | 0.0427               | 0.0000  | 0.1752  | Spine  | Spine    | 0.0436        | 0.0000       | -0.0796 | Head    | Head      | 0.0436       | 0.0000  | -0.0796 | Head    | Head    |
| CSSBL      | -0.0059              | 0.0500  | 0.1871  | Spine  | Spine  | -0.0059              | 0.0500  | 0.1871  | Spine  | Spine    | -0.0062       | 0.0500       | -0.0748 | Head    | Head      | -0.0062      | 0.0500  | -0.0748 | Head    | Head    |
| CSSBR      | -0.0059              | -0.0500 | 0.1871  | Spine  | Spine  | -0.0059              | -0.0500 | 0.1871  | Spine  | Spine    | -0.0062       | -0.0500      | -0.0748 | Head    | Head      | -0.0062      | -0.0500 | -0.0748 | Head    | Head    |
| HE (l/r)   | $-0.0750 \pm 0.0796$ |         |         |        | Pelvis | $-0.0750 \pm 0.0896$ |         |         |        | Pelvis   | $-0.0750$     | $\mp 0.0188$ | 0.1209  | Thigh   | $-0.0200$ | $\mp 0.0088$ | 0.0309  | Thigh   | Thigh   |         |
| HF (l/r)   | $0.0650 \pm 0.0396$  |         |         |        | Pelvis | $0.0750 \pm 0.0396$  |         |         |        | Pelvis   | $0.0150$      | $\mp 0.0188$ | 0.1011  | Thigh   | $0.0150$  | $\mp 0.0188$ | 0.0200  | Thigh   | Thigh   |         |
| HAbd (l/r) | $-0.0250 \pm 0.1200$ |         |         |        | Pelvis | $0.0000 \pm 0.1519$  |         |         |        | Pelvis   | $-0.0300$     | $\pm 0.0400$ | 0.0354  | Thigh   | $-0.0200$ | $\pm 0.0300$ | 0.0050  | Thigh   | Thigh   |         |
| HAdd (l/r) | 0.0000               |         |         |        | Pelvis | $-0.0100 \pm 0.0100$ |         |         |        | Pelvis   | $-0.0050$     | $\mp 0.0351$ | 0.0902  | Thigh   | $0.0000$  | $\mp 0.0201$ | 0.0102  | Thigh   | Thigh   |         |
| KF (l/r)   | -0.0500              | 0.0000  | 0.0000  | Thigh  | Thigh  | -0.0500              | 0.0000  | -0.1075 | Thigh  | Thigh    | -0.0594       | 0.0000       | 0.1060  | Shank   | Shank     | -0.0297      | 0.0000  | 0.1000  | Shank   | Shank   |
| KE (l/r)   | 0.0400               | 0.0000  | 0.0000  | Thigh  | Thigh  | 0.0299               | 0.0000  | 0.2527  | Thigh  | Thigh    | 0.0300        | 0.0000       | 0.0500  | Shank   | Shank     | 0.0300       | 0.0000  | 0.0500  | Shank   | Shank   |
| FE (l/r)   | -0.0500              | 0.0000  | -0.0250 | Shank  | Shank  | -0.0500              | 0.0000  | -0.1750 | Shank  | Shank    | -0.1250       | 0.0000       | 0.0500  | Foot    | Foot      | -0.1250      | 0.0000  | 0.0500  | Foot    | Foot    |
| FF (l/r)   | 0.0300               | 0.0000  | -0.0250 | Shank  | Shank  | 0.0300               | 0.0000  | -0.1750 | Shank  | Shank    | 0.0300        | 0.0000       | 0.0500  | Foot    | Foot      | 0.0300       | 0.0000  | 0.0500  | Foot    | Foot    |
| SE (l/r)   | $-0.0688 \pm 0.1816$ |         |         |        | Spine  | $-0.0500$            |         |         |        | Uparm    | $-0.0172$     | 0.0000       | 0.0000  | Uparm   | $-0.0172$ | 0.0000       | 0.0000  | Uparm   | Uparm   |         |
| SF (l/r)   | $0.0216 \pm 0.1816$  |         |         |        | Spine  | $0.0216 \pm 0.1816$  |         |         |        | Spine    | $0.0172$      | 0.0000       | 0.0000  | Uparm   | $0.0172$  | 0.0000       | 0.0000  | Uparm   | Uparm   |         |
| SAbd (l/r) | $-0.0263 \pm 0.2422$ |         |         |        | Spine  | $-0.0263 \pm 0.2422$ |         |         |        | Spine    | $0.0000$      | $\pm 0.0172$ | 0.0000  | Uparm   | $0.0000$  | $\pm 0.0172$ | 0.0000  | Uparm   | Uparm   |         |
| SAdd (l/r) | -0.0236              | 0.0000  | 0.1257  | Spine  | Spine  | $0.0073 \pm 0.1250$  | 0.1033  | Spine   | Spine  | $0.0000$ | $\mp 0.0400$  | 0.1250       | Uparm   | Uparm   | $0.0000$  | $\mp 0.0172$ | 0.0000  | Uparm   | Uparm   |         |
| EF (l/r)   | 0.0246               | 0.0000  | 0.0000  | Uparm  | Uparm  | 0.0300               | 0.0000  | -0.0500 | Uparm  | Uparm    | 0.0300        | 0.0000       | 0.0136  | Forearm | Forearm   | 0.0238       | 0.0000  | -0.1000 | Forearm | Forearm |
| EE (l/r)   | -0.0246              | 0.0000  | 0.0000  | Uparm  | Uparm  | -0.0493              | 0.0000  | -0.1603 | Uparm  | Uparm    | -0.0476       | 0.0000       | 0.1002  | Forearm | Forearm   | -0.0238      | 0.0000  | 0.0000  | Forearm | Forearm |

Table 3: Muscle routing parameters: Origin  $R_O$ , Deflection Point 1  $R_{DF1}$  and 2  $R_{DF2}$  and Insertion  $R_I$  relative to their parent body. All numbers in this table are rounded to four decimal digits. Muscle names: EF, EE, FF, FE, HAbd, HAdd, HF, HE, CSF, CSSBL, CSSBR, CSE, KF, KE, LSF, LSSBL, LSSBR, LSE, SAbd, SAdd, SF, SE.

|       | $F^{\max}$ [N] | $l^{\text{CE,opt}}$ [m] | $\Delta W^{\text{asc}}$ | $l^{\text{SEE},0}$ [m] |
|-------|----------------|-------------------------|-------------------------|------------------------|
| EF    | 1420.0         | 0.1885                  | 1.0                     | 0.1845                 |
| EE    | 1550.0         | 0.171                   | 0.525                   | 0.18                   |
| FF    | 3000.0         | 0.15                    | 1.0                     | 0.133                  |
| FE    | 3000.0         | 0.13                    | 1.0                     | 0.115                  |
| HAbd  | 2000.0         | 0.18                    | 1.0                     | 0.121                  |
| HAdd  | 2000.0         | 0.204                   | 0.75                    | 0.136                  |
| HF    | 5000.0         | 0.195                   | 1.0                     | 0.135                  |
| HE    | 5000.0         | 0.192                   | 1.0                     | 0.191                  |
| CSF   | 5000.0         | 0.07                    | 1.5                     | 0.01                   |
| CSSBL | 5000.0         | 0.05                    | 1.5                     | 0.01                   |
| CSSBR | 5000.0         | 0.046                   | 1.5                     | 0.01                   |
| CSE   | 5000.0         | 0.062                   | 1.5                     | 0.01                   |
| KF    | 6000.0         | 0.258                   | 0.525                   | 0.112                  |
| KE    | 6000.0         | 0.264                   | 1.0                     | 0.28                   |
| LSF   | 15000.0        | 0.2                     | 1.5                     | 0.11                   |
| LSSBL | 15000.0        | 0.09                    | 1.5                     | 0.02                   |
| LSSBR | 15000.0        | 0.09                    | 1.5                     | 0.02                   |
| LSE   | 15000.0        | 0.075                   | 1.5                     | 0.04                   |
| SAbd  | 6000.0         | 0.12                    | 1.0                     | 0.08                   |
| SAdd  | 6000.0         | 0.225                   | 1.0                     | 0.12                   |
| SF    | 10000.0        | 0.1                     | 1.0                     | 0.073                  |
| SE    | 6000.0         | 0.165                   | 1.0                     | 0.105                  |

Table 4: Muscle-specific actuation parameters, with  $F^{\max}$ : maximum isometric force,  $l^{\text{CE,opt}}$ : optimal length of the CE,  $\Delta W^{\text{asc}}$ : width of normalized bell curve in ascending branch of the force-length relationship,  $l^{\text{SEE},0}$  rest length of the SEE,  $l^{\text{CE,init}}$ : initial length of the CE. Muscle names: Elbow Flexion (EF), Elbow Extension (EE), Foot Flexion (FF), Foot Extension (FE), Hip Abduction (HAbd), Hip Adduction (HAdd), Hip Flexion (HF), Hip Extension (HE), Cervical Spine Flexion (CSF), Cervical Spine Side Bend Left (CSSBL), Cervical Spine Side Bend Right (CSSBR), Cervical Spine Extension (CSE), Knee Flexion (KF), Knee Extension (KE), Lumbar Spine Flexion (LSF), Lumbar Spine Side Bend Left (LSSBL), Lumbar Spine Side Bend Right (LSSBR), Lumbar Spine Extension (LSE), Shoulder Abduction (SAbd), Shoulder Adduction (SAdd), Shoulder Flexion (SF), Shoulder Extension (SE).

|                     | Parameter                    | Unit    | Value                | Source                                                   | Description                                                                                            |
|---------------------|------------------------------|---------|----------------------|----------------------------------------------------------|--------------------------------------------------------------------------------------------------------|
| CE                  | $\Delta W^{\text{des}}$      | [ ]     | 0.45                 | similar to Bayer et al. (2017); Kistemaker et al. (2006) | width of normalized bell curve in descending branch, adapted to match observed force-length curves     |
|                     | $\nu^{\text{CE,des}}$        | [ ]     | 1.5                  | Mörl et al. (2012)                                       | exponent for descending branch                                                                         |
|                     | $\nu^{\text{CE,asc}}$        | [ ]     | 3.0                  | Mörl et al. (2012)                                       | exponent for ascending branch                                                                          |
|                     | $A^{\text{rel},0}$           | [ ]     | 0.2                  | Günther (1997)                                           | parameter for contraction dynamics: maximum value of $A^{\text{rel}}$                                  |
|                     | $B^{\text{rel},0}$           | [1/s]   | 2.0                  | Günther (1997)                                           | parameter for contraction dynamics: maximum value of $B^{\text{rel}}$                                  |
|                     | $\mathcal{S}^{\text{ecc}}$   | [ ]     | 2.0                  | van Soest et al. (1993)                                  | relation between $F(v)$ slopes at $v^{\text{CE}} = 0$                                                  |
|                     | $\mathcal{G}^{\text{ecc}}$   | [ ]     | 1.5                  | van Soest et al. (1993)                                  | factor by which the force can exceed $F^{\text{isom}}$ for large eccentric velocities                  |
| PEE                 | $\mathcal{L}^{\text{PEE},0}$ | [ ]     | 0.95                 | Günther (1997)                                           | rest length of PEE normalized to optimal length of CE                                                  |
|                     | $\nu^{\text{PEE}}$           | [ ]     | 2.5                  | Mörl et al. (2012)                                       | exponent of $F^{\text{PEE}}$                                                                           |
|                     | $\mathcal{G}^{\text{PEE}}$   | [ ]     | 2.0                  | Mörl et al. (2012)                                       | force of PEE if $l^{\text{CE}}$ is stretched to $\Delta W^{\text{des}}$                                |
| SDE                 | $D^{\text{SDE}}$             | [ ]     | 0.3                  | Mörl et al. (2012)                                       | dimensionless factor to scale $d^{\text{SDE,max}}$                                                     |
|                     | $R^{\text{SDE}}$             | [ ]     | 0.01                 | Mörl et al. (2012)                                       | minimum value of $d^{\text{SDE}}$ (at $F^{\text{MTU}} = 0$ ), normalized to $d^{\text{SDE,max}}$       |
| SEE                 | $\Delta U^{\text{SEE,nl}}$   | [ ]     | 0.0425               | Mörl et al. (2012)                                       | relative stretch at non-linear linear transition                                                       |
|                     | $\Delta U^{\text{SEE,l}}$    | [ ]     | 0.017                | Mörl et al. (2012)                                       | relative additional stretch in the linear part providing a force increase of $\Delta F^{\text{SEE},0}$ |
|                     | $\Delta F^{\text{SEE},0}$    | [N]     | $0.4 F^{\text{max}}$ |                                                          | both force at the transition and force increase in the linear part                                     |
| activation dynamics | $M_H$                        | [1/s]   | 11.3                 | Kistemaker et al. (2006)                                 | time constant for the activation dynamics                                                              |
|                     | $\gamma_c$                   | [mol/l] | 1.37e-4              | Kistemaker et al. (2006)                                 | constant for the activation dynamics                                                                   |
|                     | $\rho_0$                     | [l/mol] | 5.27e4               | Kistemaker et al. (2006)                                 | constant for the activation dynamics                                                                   |
|                     | $a_0$                        | [ ]     | 0.005                | Günther (1997)                                           | resting active state for all activated muscle fibers                                                   |
|                     | $\nu$                        | [ ]     | 3                    | Kistemaker et al. (2006)                                 | constant for the activation dynamics                                                                   |

Table 5: Muscle non-specific actuation parameters for the muscles and the activation dynamics.



## List of Abbreviations

**AAS** Agonistic-Antagonistic Setup

**MTU** Muscle Tendon Unit

**DHM** Digital Human Model

**CE** Contractile Element

**PEE** Parallel Elastic Element

**SEE** Serial Elastic Element

**SDE** Serial Damping Element

**EBD** Elementary Biological Drive

**DoF** Degree of Freedom

**RoM** Range of Motion

**EF** Elbow Flexion

**EE** Elbow Extension

**FF** Foot Flexion

**FE** Foot Extension

**HAbd** Hip Abduction

**HAdd** Hip Adduction

**HF** Hip Flexion

**HE** Hip Extension

**CSF** Cervical Spine Flexion

**CSSBL** Cervical Spine Side Bend Left

**CSSBR** Cervical Spine Side Bend Right

**CSE** Cervical Spine Extension

**KF** Knee Flexion

**KE** Knee Extension

**LSF** Lumbar Spine Flexion

**LSSBL** Lumbar Spine Side Bend Left

**LSSBR** Lumbar Spine Side Bend Right

**LSE** Lumbar Spine Extension

**SAbd** Shoulder Abduction

**SAdd** Shoulder Adduction

**SF** Shoulder Flexion

**SE** Shoulder Extension

## References

Bayer, A., Schmitt, S., Günther, M., and Haeufle, D. F. The influence of biophysical muscle properties on simulating fast human arm movements. *Computer Methods in Biomechanics and Biomedical Engineering*, 20(8):803–821, 2017.

Günther, M. *Computersimulationen zur Synthetisierung des muskulär erzeugten menschlichen Gehens unter Verwendung eines biomechanischen Mehrkörpermodells*. PhD thesis, Eberhard-Karls-Universität zu Tübingen, 1997.

Haeufle, D. F. B., Günther, M., Bayer, A., and Schmitt, S. Hill-type muscle model with serial damping and eccentric force-velocity relation. *Journal of Biomechanics*, 47(6):1531–1536, 2014.

Hammer, M., Günther, M., Haeufle, D., and Schmitt, S. Tailoring anatomical muscle paths: a sheath-like solution for muscle routing in musculoskeletal computer models. *Mathematical Biosciences*, accepted (February):68–81, 2019.

Hatze, H. A Myocybernetic Control Model of Skeletal Muscle. *Biol. Cybernetics*, 25:103–119, 1977.

Kistemaker, D. a., Van Soest, A. J., and Bobbert, M. F. Is equilibrium point control feasible for fast goal-directed single-joint movements? *Journal of Neurophysiology*, 95(5):2898–912, 2006.

- Kitazaki, S. and Griffin, M. A modal analysis of whole-body vertical vibration, using a finite element model of the human body. *Journal of Sound and Vibration*, 200(1):83 – 103, 1997. doi: <https://doi.org/10.1006/jsvi.1996.0674>.
- Legnani, G., Casolo, F., Righettini, P., and Zappa, B. A homogeneous matrix approach to 3d kinematics and dynamics - i. theory. *Mechanism and Machine Theory*, 31(5):573 – 587, 1996.
- Mörl, F., Siebert, T., Schmitt, S., Blickhan, R., and Günther, M. Electro-Mechanical Delay in Hill-Type Muscle Models. *Journal of Mechanics in Medicine and Biology*, 12(05):1250085, 2012.
- NASA. *Anthropometric Source Book, Volume I-III*. NASA Anthropometry Project, 1978.
- Rockenfeller, R. and Günther, M. Inter-filament spacing mediates calcium binding to troponin: A simple geometric-mechanistic model explains the shift of force-length maxima with muscle activation. *Journal of Theoretical Biology*, 454:240 – 252, 2018.
- Rockenfeller, R., Günther, M., Schmitt, S., and Götz, T. Comparing different muscle activation dynamics using sensitivity analysis. *CoRR*, 2014.
- Schmitt, S., Günther, M., and Haeufle, D. F. B. The dynamics of the skeletal muscle: a systems biophysics perspective on muscle modeling with the focus on hill-type muscle models. *GAMM-Mitteilungen*, 42(3):nil, 2019.
- van Soest, A., Bobbert, M., Iijima, T., Shimizu, K., and Asanuma, N. The Contribution of Muscle Properise in the Control of Explosive Movments. *Biological Cybernetics*, 69(3):195–204, 1993.
